# Supplementary material for: Interactions Between Delivery, Transport, and Phosphorylation of Glucose in Governing Uptake Into Human Skeletal Muscle
Source: Oxford University Press journal article supplement (doi:10.2337/db06-0762), 2006-10-25
Supplement: pg3028onlineappendix.doc [file pg3028onlineappendix.doc]

**APPENDIX**

To derive the glucose model in terms of concentration, the model is formulated in terms of mass. The mass representation is shown in Fig.1. The mass balance equations are:

(1)

where , , are the glucose amounts in plasma, extra-cellular space, and tissue , respectively, and is the amount of phosphorylated glucose in tissue.

*Fig.1.*

Denoting , , as the plasma, extra-cellular and tissue volumes respectively, the equations are:

(2)

Dividing by :

(3)

Defining:

(4)

The mass balance equations in terms of concentration can be written (Fig.2):

(5)

where:

is the glucose extra-cellular concentration normalized to intracellular volume;

is the intracellular glucose concentration, and

is the intracellular concentration of phosphorylated glucose

*Fig.2*

Considering steady state conditions, wherein:

(6)

one obtains:

(7)

Since k6 is not estimable from the triple tracer PET study, only Ci and Ce can be calculated assuming Cp = plasma glucose. However, only Ce has a direct physiological meaning while Ci is a value normalized to tissue volume.

The model allows for the calculation of two operational distribution volumes, one related to the extra-cellular (Vec) and one related to the intracellular (Vic) space:

(8)

From Eq.8:

(9)

Eq.9 gives the ratio of the “true” glucose mass in the intracellular space to “true” glucose mass in the extra-cellular space.
